# Supplementary material for: Gsk3β deficiency in macrophages alleviates the progression of nonalcoholic steatohepatitis by promoting PINK1-mediated mitophagic autophagy α β γ
Source: Research Square preprint supplement (doi:10.21203/rs.3.rs-2661020/v1), 2023-04-14
Supplement: Supplementary file 1 [file 5aa2f4725e34d612dbefc963.docx]

**Supplemental table 2. Primers (H, human and M, denotes mice).**

| **Primer sequences** | |  |
| --- | --- | --- |
| **Gene Symbol** | **Forward Primer Reverse Primer** | |
| M-β-Actin | GTGACGTTGACATCCGTAAAGA GCCGGACTCATCGTACTCC | |
| M-Pparg | GGAAGACCACTCGCATTCCTT GTAATCAGCAACCATTGGGTCA | |
| M-Fabp4 | AAGGTGAAGAGCATCATAACCCT TCACGCCTTTCATAACACATTCC | |
| M-Cd36 | ATGGGCTGTGATCGGAACTG TTTGCCACGTCATCTGGGTTT | |
| M-Fasn | GGAGGTGGTGATAGCCGGTAT TGGGTAATCCATAGAGCCCAG | |
| M-Acadl | TTTCCTCGGAGCATGACATTTT GCCAGCTTTTTCCCAGACCT | |
| M-Ppara | AACATCGAGTGTCGAATATGTGG CCGAATAGTTCGCCGAAAGAA | |
| M-Acadm | AACACAACACTCGAAAGCGG TTCTGCTGTTCCGTCAACTCA | |
| M-Cpt1a | TGGCATCATCACTGGTGTGTT GTCTAGGGTCCGATTGATCTTTG | |
| M-NLRP3 | ATTACCCGCCCGAGAAAGG TCGCAGCAAAGATCCACACAG | |
| M-IL-6 | TCCATCCAGTTGCCTTCTTG TTCCACGATTTCCCAGAGAAC | |
| M-IL-10 | ACAGGGAAGAAATCGATGACA TGGGGGAGAACCTGAAGA | |
| M-TNF-α | GCCAGAGGGCTGATTAGAGA CAGCCTCTTCTCCTTCCTGAT | |
| M-IL-1β | GCAACTGTTCCTGAACTCAACT ATCTTTTGGGGTCCGTCAACT | |
|  | | |
