# Supplementary material for: Gsk3β deficiency in macrophages alleviates the progression of nonalcoholic steatohepatitis by promoting PINK1-mediated mitophagic autophagy α β γ
Source: Research Square preprint supplement (doi:10.21203/rs.3.rs-2661020/v1), 2023-04-14
Supplement: Supplementary file 2 [file 5d4bdc46604f9fb15be9180f.docx]

**Supplemental table 1. Mouse genotyping primer and identification**

| **Mating Information** | **Gsk3b：fl/null/wt × fl/null/wt，**  **Lyz2：mut/wt × mut/wt** | |
| --- | --- | --- |
| **Remarks** | | |
| **Primer information：**   | **No.** | **Primer Name** | **Sequence** | **Expected Band Size** | **Primer illustration** | | --- | --- | --- | --- | --- | | **1** | **707956-Gsk3b-5wt-tF1** | **CTTTGACTTGGGGCAACCTTA** | **Fl=305bp**  **Wt=212bp** | **Identification of Gsk3b** | | **707956-Gsk3b-5wt-tR1** | **GTGAATACCAGAAGACAACAGGG** | | **2** | **707956-Gsk3b-null-tF1** | **TCAGAATGGTCAGGATGAAGTTGG** | **Fl=2055bp**  **Wt=1872bp**  **Null=768bp** | | **707956-Gsk3b-null-tR1** | **TACCACAGCATGTGAGCGTCC** | | **3** | **oIMR3066** | **CCCAGAAATGCCAGATTACG** | **Mut：~700bp** | **Identification of Lyz2-cre** | | **oIMR3067** | **CTTGGGCTGCCAGAATTTCTC** | | **4** | **oIMR3067** | **CTTGGGCTGCCAGAATTTCTC** | **Wt：~350bp** | | **oIMR3068** | **TTACAGTCGGCCAGGCTGAC** | | | |
| **Description of Scheme：** | | |
| **Concentration of gel：2.0%** | | **Electrophoretic diagram：** |
| 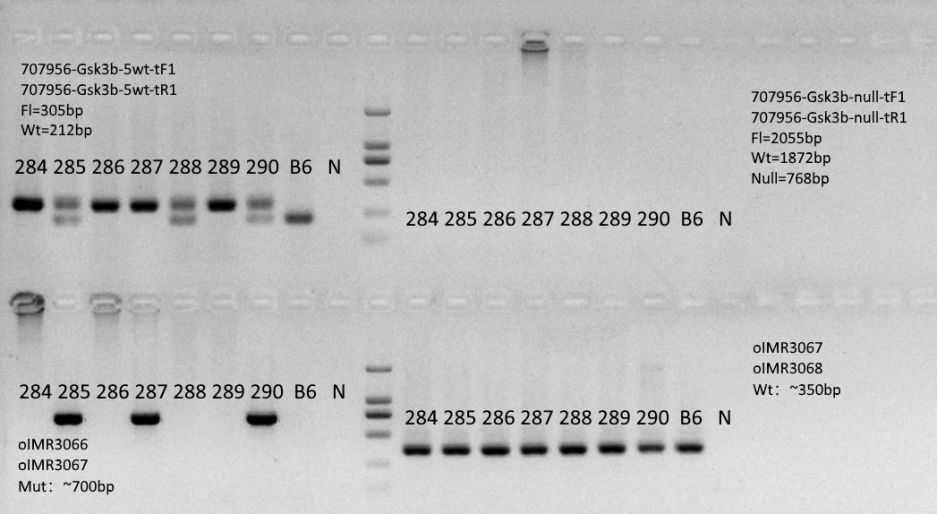  **Note: B6 was the negative control，It's the B6 mouse genome DNA**  **N is blank control, no template control** | | |
| **Analysis and Conclusion：** | | |
| **Gsk3b：**  **fl/fl：284，286，287，289**  **fl/wt：other**  **Lyz2-cre：**  **mut/wt：285，287，290**  **wt/wt：other** | | |
